# Supplementary material for: Neutrophil Extracellular Traps in Plasma from Dogs with Immune‐mediated Hemolytic Anemia
Source: PubMed Central journal article supplement — J Vet Intern Med. 2017 Dec 7;32(1):128–34. doi: 10.1111/jvim.14881 (PMC5787156; doi:10.1111/jvim.14881), 2017-12-07
Supplement: JVIM-32-128-s001.pdf [file JVIM-32-128-s001.pdf]

## Neutrophil Extracellular Traps in Plasma from Dogs with Immune-mediated Hemolytic Anemia

| Correlation | CitH3 R | CitH3 p value |
|-------------|---------|---------------|
| SYTOX       | -0.0766 | 0.741         |

Correlation data between SYTOX Green cell free DNA and Citrullinated Histone 3 assays.
